# Supplementary material for: Confinement effect of monolayer MoS2 quantum dots on conjugated polyimide and promotion of solar-driven photocatalytic hydrogen generation
Source: Royal Society of Chemistry journal article supplement (doi:10.1039/c6dt04916h), 2017-01-01
Supplement: c6dt04916h1.pdf [file c6dt04916h1.pdf]

## Supporting Information

Confinement effect of monolayer MoS<sub>2</sub> quantum dots on conjugated polyimide and promotion for solardrivn photocatalytic hydrogen generation

*Chenghai Ma, Haoyue Zhu, Jun Zhou, Zhiwei Cui, Teng Liu, Yicong Wang, Ying Wang,\* and Zhigang Zou\**

Table S1 The amounts of the reactants for synthesis of the samples

| Samples*         | Reactants (mg) |                                                                                    |                                   |
|------------------|----------------|------------------------------------------------------------------------------------|-----------------------------------|
|                  | PI             | (NH <sub>4</sub> ) <sub>6</sub> Mo <sub>7</sub> O <sub>24</sub> ·4H <sub>2</sub> O | CS(NH <sub>2</sub> ) <sub>2</sub> |
| 0.1MQDs/PI       | 999            | 1.10                                                                               | 2.38                              |
| 0.3MQDs/PI       | 997            | 3.30                                                                               | 7.13                              |
| 0.5MQDs/PI       | 995            | 5.50                                                                               | 11.89                             |
| 1.0MQDs/PI       | 990            | 11.0                                                                               | 23.78                             |
| 3.0MQDs/PI       | 970            | 33.0                                                                               | 71.33                             |
| MoS <sub>2</sub> | —              | 1104                                                                               | 2376                              |

\*All samples were synthesized by a facile immersion-hydrothermal method. The amounts of the reactants were calculated according to the synthesis of 1 g sample.

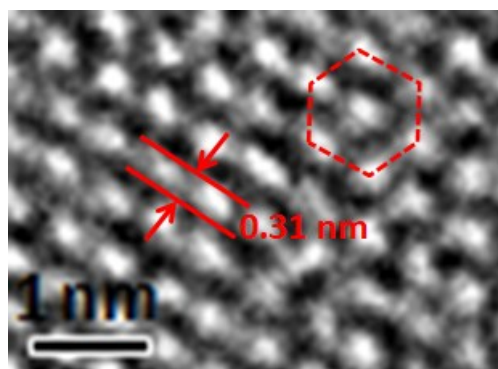

**Figure S1.** HR-TEM images of 1.0MQDs/PI composite powder samples.

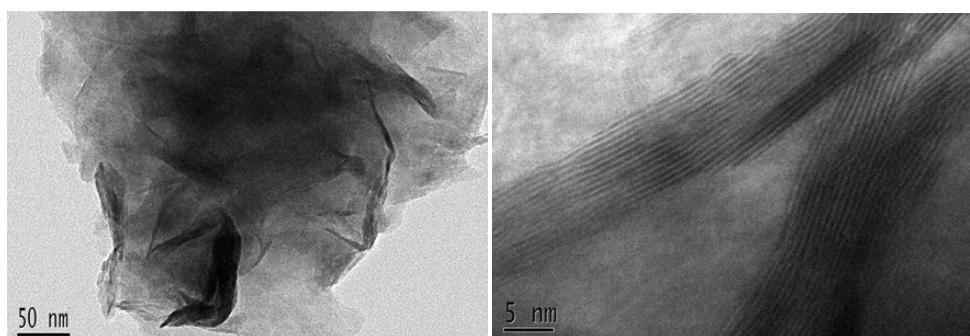

**Figure S2.** HR-TEM images of layered bulk MoS<sub>2</sub> powder samples.

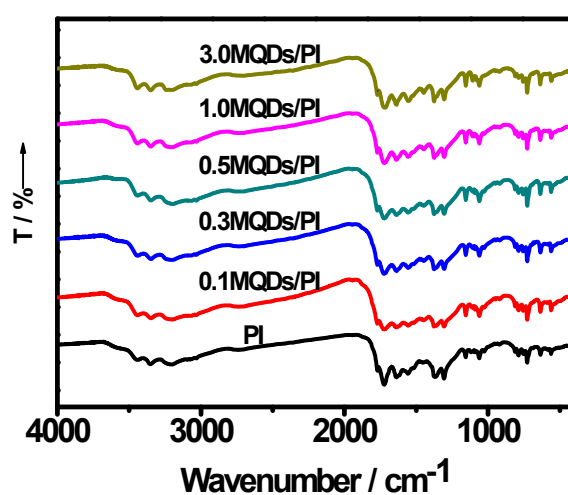

**Figure S3.** FTIR spectrum of PI and MQDs/PI composite powder samples.

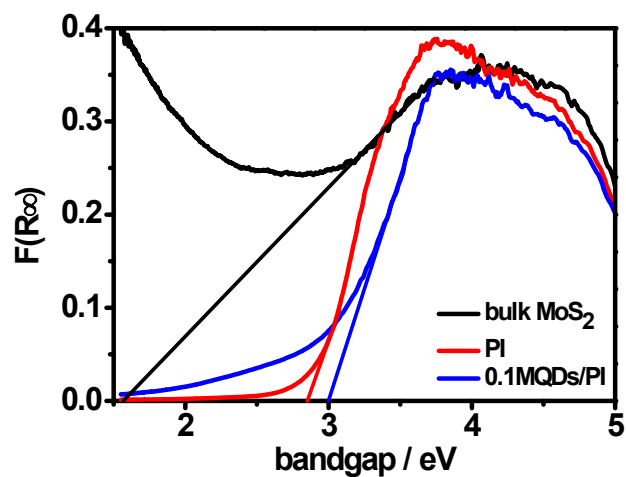

**Figure S4.** Comparison of bandgaps of bulk MoS<sub>2</sub>, PI and 0.1MQDs/PI estimated from UV-vis spectra.

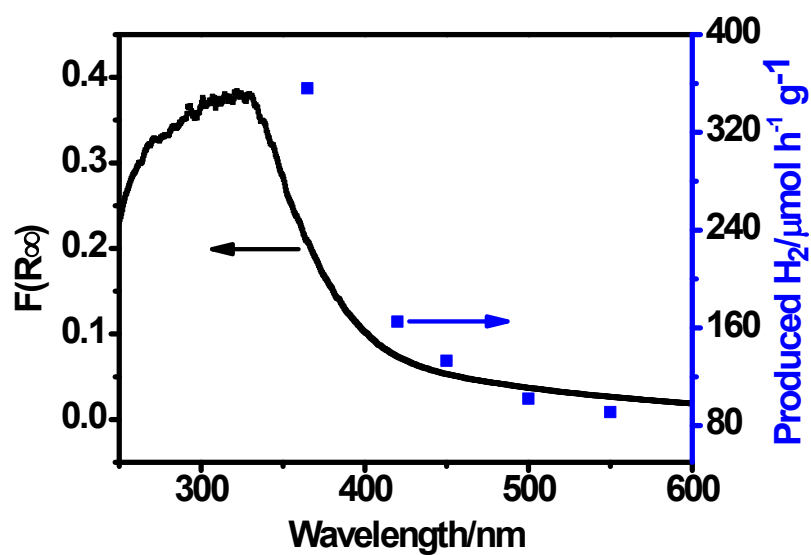

**Figure S5.** Wavelength dependence of H<sub>2</sub> evolution rate over 1.0MQDs/PI composite powder sample.

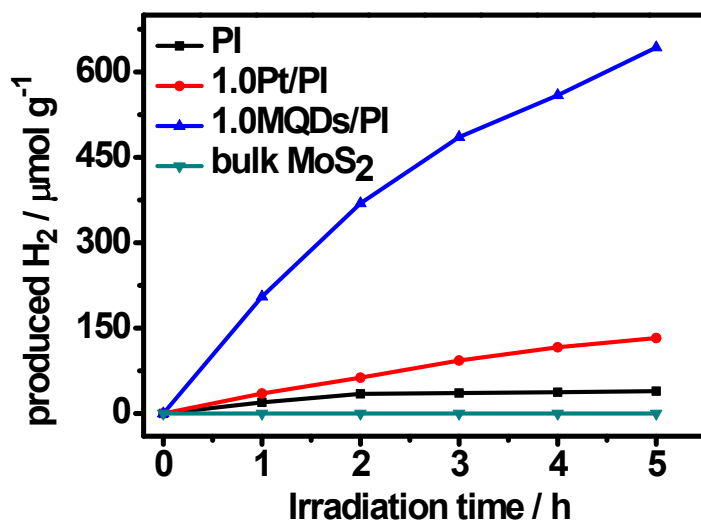

**Figure S6.** Comparison of photocatalytic activities of pristine PI, 1.0Pt/PI, 1.0 MQDs and bulk MoS<sub>2</sub> powder samples under visible light irradiation ( $\lambda > 420$  nm, 10 vol. % methanol aq.).

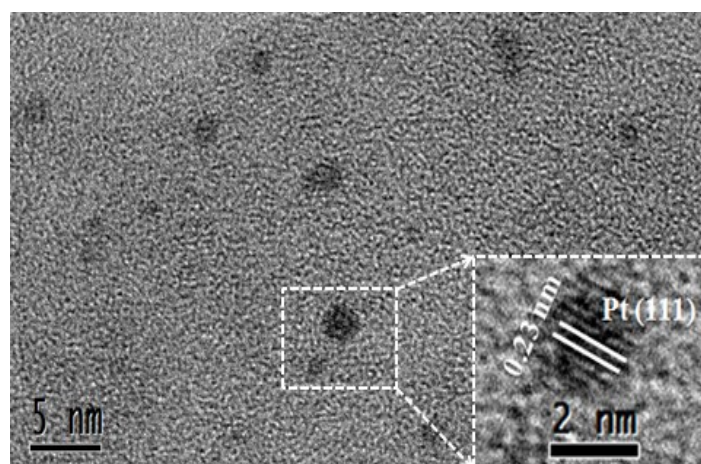

**Figure S7.** TEM image of 1.0Pt/PI powder sample. Some Pt particles are marked in white circles. The inset is a high resolution TEM image.

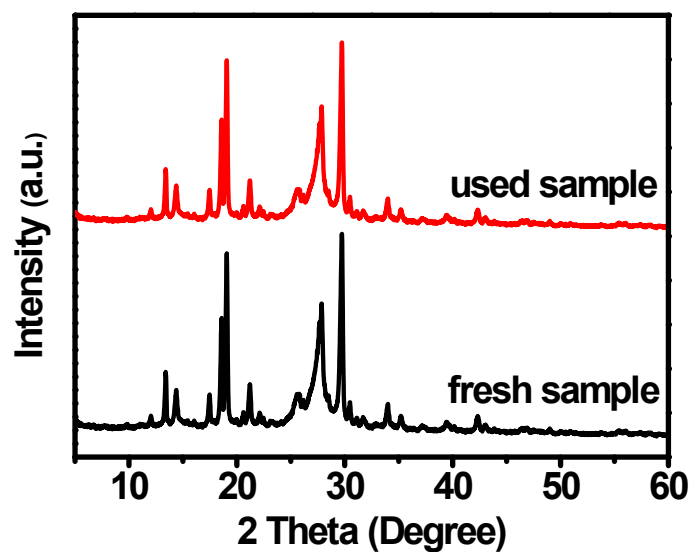

**Figure S8.** XRD patterns of 1.0 MQDs/PI composite powder sample before and after photocatalytic H<sub>2</sub> evolution.

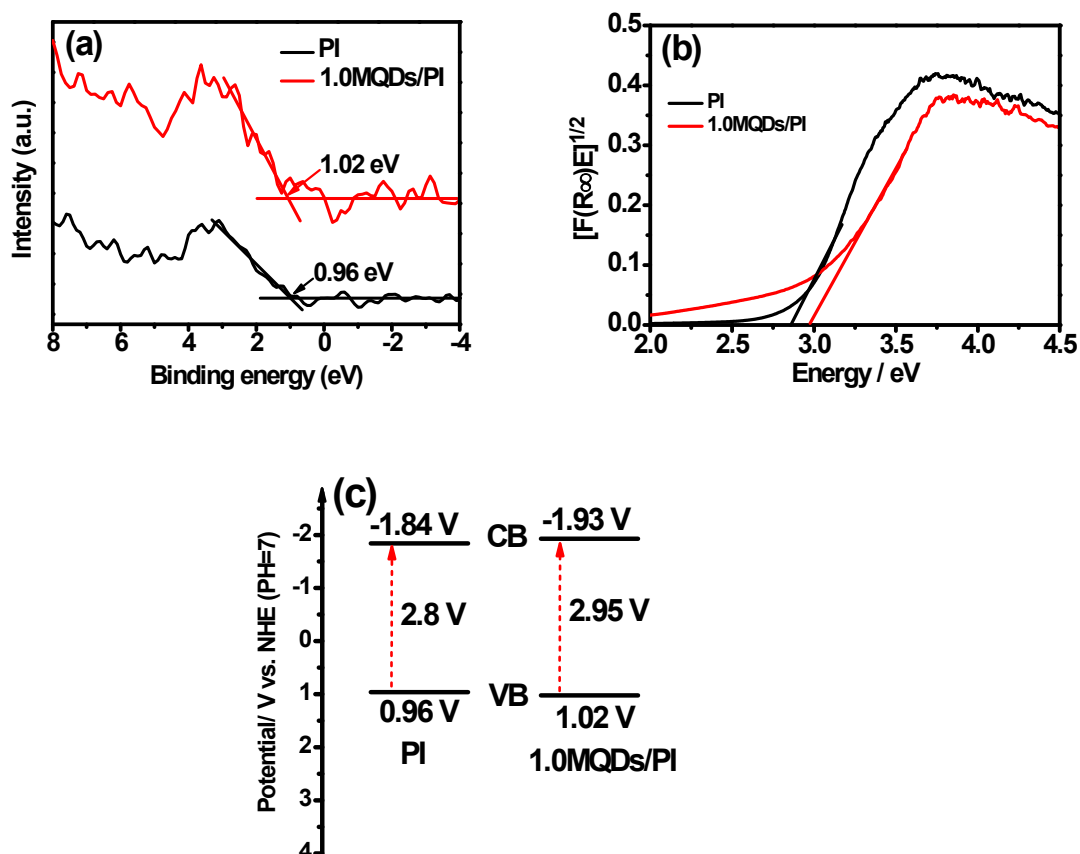

**Figure S9.**(a)VBXPS spectra, (b) bandgaps and (c) band edge positions of PI and 1.0MQDs/PI powder samples.
